# Supplementary material
Source: PubMed Central journal article supplement (PMC2843202)
Supplement: supp_M109.092429_jbc.M109.092429-1.pdf [file supp_M109.092429_jbc.M109.092429-1.pdf]

**Supplementary Table 1. Primer sequences, annealing temperatures and expected PCR-product lengths.** The intact floxed allele produces a 451 bp product with the LoxP1 primer set, whereas Cre excision results in a 317 bp product.

| detected elements       | primers                 | Sequence 5'→ 3'                                                  | T <sub>M</sub> (°C) | fragment size (bp)                 |
|-------------------------|-------------------------|------------------------------------------------------------------|---------------------|------------------------------------|
| <i>Genotyping</i>       |                         |                                                                  |                     |                                    |
| Lox P1                  | GS-F 2838<br>GS-R 3260  | ACCCCTTGAAAGCAGAGTGA<br>GAAAAGCCTTGCAAACCAAA                     | 60                  | WT allele: 423<br>Flox allele: 451 |
| LacZ                    | LacZ-F<br>LacZ-R        | GCATCGAGCTGGGTAATAAGCGTTGGCAAT<br>ACTGCAACAACGCTGCTTCGGCCTGGTAAT | 69                  | 255                                |
| Cre                     | Cre-F<br>Cre-R          | GGTTCGCAAGAACCCTGATGGACAT<br>GCTAGAGCCTGTTTTGCACGTTCA            | 63                  | 342                                |
| <i>Cre-excision</i>     |                         |                                                                  |                     |                                    |
| Cre excision            | GS-F 2838<br>GS-R 10587 | ACCCCTTGAAAGCAGAGTGA<br>TGGCACAATGTAGGATCCAG                     | 60                  | null allele: 317                   |
| <i>Quantitative-PCR</i> |                         |                                                                  |                     |                                    |
| GS-mRNA                 | GS F 3007<br>GS R 4740  | TGGCCACCTCAGCAAGTT<br>GGCTCCGGTTATACTTG                          | 55                  |                                    |
| 18S rRNA                | 18S-F<br>18S-R          | TTCGGAACTGAGGCCATGAT<br>CGAACCTCCGACTTTCGTTCT                    | 58                  |                                    |

**Supplementary Table 2. Arterial and tissue concentrations of amino acids after 0, 4, 20 and 36 hours of fasting.** The values are expressed as  $\mu\text{mol/L}$  plasma or  $\text{kg}$  muscle.

| Plasma        | fed     |     |         |     | 4-hour-fasting |     |         |     | 20-hour-fasting |      |         |     | 36-hour-fasting |     |         |     |
|---------------|---------|-----|---------|-----|----------------|-----|---------|-----|-----------------|------|---------|-----|-----------------|-----|---------|-----|
|               | control |     | GS-KO/M |     | control        |     | GS-KO/M |     | control         |      | GS-KO/M |     | control         |     | GS-KO/M |     |
|               | Mean    | SEM | Mean    | SEM | Mean           | SEM | Mean    | SEM | Mean            | SEM  | Mean    | SEM | Mean            | SEM | Mean    | SEM |
| ASP           | 108     | 22  | 33      | 13  | NA             | .   | NA      | .   | 73              | 16   | 29      | 7   | 41              | 15  | 14      | 4   |
| GLU           | 26      | 4   | 48      | 9   | 61             | 7   | 63      | 7   | 25              | 8    | 25      | 9   | 7               | 4   | 12      | 4   |
| ASN           | 73      | 18  | 33      | 8   | 53             | 4   | 48      | 3   | 45              | 6    | 34      | 4   | 32              | 3   | 32      | 2   |
| SER           | 402     | 80  | 178     | 38  | 112            | 4   | 127     | 4   | 298             | 50   | 184     | 30  | 166             | 36  | 58      | 10  |
| GLN           | 582     | 33  | 484     | 56  | 586            | 17  | 476     | 12  | 559             | 49   | 329     | 15  | 612             | 39  | 485     | 20  |
| HIS           | 119     | 12  | 109     | 22  | 87             | 3   | 78      | 4   | 103             | 10   | 77      | 9   | 76              | 6   | 57      | 4   |
| GLY           | 239     | 27  | 308     | 58  | 223            | 7   | 247     | 9   | 240             | 36   | 137     | 21  | 143             | 46  | 89      | 12  |
| THR           | 223     | 22  | 190     | 30  | 129            | 4   | 150     | 7   | 197             | 17   | 149     | 13  | 134             | 11  | 132     | 8   |
| ARG           | 110     | 10  | 120     | 24  | 128            | 5   | 128     | 7   | 107             | 15   | 80      | 8   | 67              | 8   | 63      | 3   |
| ALA           | 477     | 40  | 387     | 55  | 324            | 18  | 279     | 21  | 397             | 50   | 247     | 23  | 263             | 24  | 241     | 16  |
| VAL           | 224     | 13  | 233     | 5   | 207            | 8   | 263     | 11  | 209             | 13   | 229     | 6   | 282             | 24  | 175     | 12  |
| MET           | 37      | 3   | 43      | 8   | 67             | 2   | 62      | 4   | 32              | 3    | 37      | 3   | 45              | 3   | 38      | 2   |
| ILE           | 93      | 6   | 108     | 14  | 68             | 4   | 95      | 4   | 110             | 12   | 92      | 7   | 141             | 13  | 94      | 8   |
| LEU           | 161     | 9   | 171     | 28  | 162            | 7   | 196     | 8   | 193             | 19   | 139     | 14  | 235             | 23  | 131     | 10  |
| <b>Muscle</b> |         |     |         |     |                |     |         |     |                 |      |         |     |                 |     |         |     |
| ASP           | 468     | 33  | 436     | 35  | 164            | 53  | 166     | 37  | 726             | 108  | 294     | 39  | 405             | 60  | 674     | 168 |
| GLU           | 585     | 52  | 592     | 45  | 2150           | 178 | 1888    | 72  | 550             | 4    | 775     | 357 | 630             | 318 | 654     | 172 |
| ASN           | 124     | 10  | 79      | 10  | 12             | 7   | 21      | 5   | 141             | 79   | 95      | 22  | 157             | 9   | 127     | 14  |
| SER           | 416     | 94  | 276     | 45  | NA             | .   | NA      | .   | 1573            | 152  | 271     | 31  | 1874            | 388 | 455     | 183 |
| GLN           | 1968    | 132 | 1165    | 66  | 1088           | 47  | 797     | 66  | 1581            | 599  | 844     | 133 | 2682            | 237 | 925     | 74  |
| HIS           | 163     | 7   | 123     | 25  | 73             | 15  | 86      | 14  | 497             | 75   | 62      | 46  | 343             | 67  | 122     | 38  |
| GLY           | 3850    | 295 | 3076    | 545 | 1451           | 125 | 1994    | 68  | 926             | 917  | 739     | 576 | 1530            | 545 | 1076    | 45  |
| THR           | 385     | 27  | 234     | 35  | 291            | 59  | 259     | 45  | 471             | 100  | 266     | 39  | 295             | 99  | 201     | 14  |
| ARG           | 220     | 23  | 160     | 17  | 114            | 20  | 90      | 17  | 573             | 340  | 294     | 32  | 877             | 76  | 565     | 159 |
| ALA           | 2771    | 110 | 2582    | 148 | 1839           | 167 | 2157    | 73  | 1509            | 1131 | 1589    | 345 | 2128            | 281 | 2093    | 295 |
| VAL           | 210     | 14  | 217     | 29  | 171            | 35  | 191     | 28  | 350             | 36   | 236     | 79  | 430             | 155 | 194     | 112 |
| MET           | 68      | 2   | 61      | 3   | 55             | 3   | 52      | 5   | 75              | 36   | 82      | 2   | 67              | 12  | 77      | 3   |
| ILE           | 90      | 5   | 102     | 3   | 50             | 13  | 71      | 10  | 184             | 11   | 118     | 41  | 154             | 25  | 80      | 34  |
| LEU           | 266     | 20  | 420     | 93  | 344            | 121 | 490     | 111 | 620             | 93   | 227     | 103 | 520             | 50  | 330     | 249 |
